# Supplementary material for: Whether vitamin D was associated with clinical outcome after IVF/ICSI: a systematic review and meta-analysis
Source: Springer Nature journal article supplement (doi:10.1186/s12958-018-0324-3), 2018-02-09

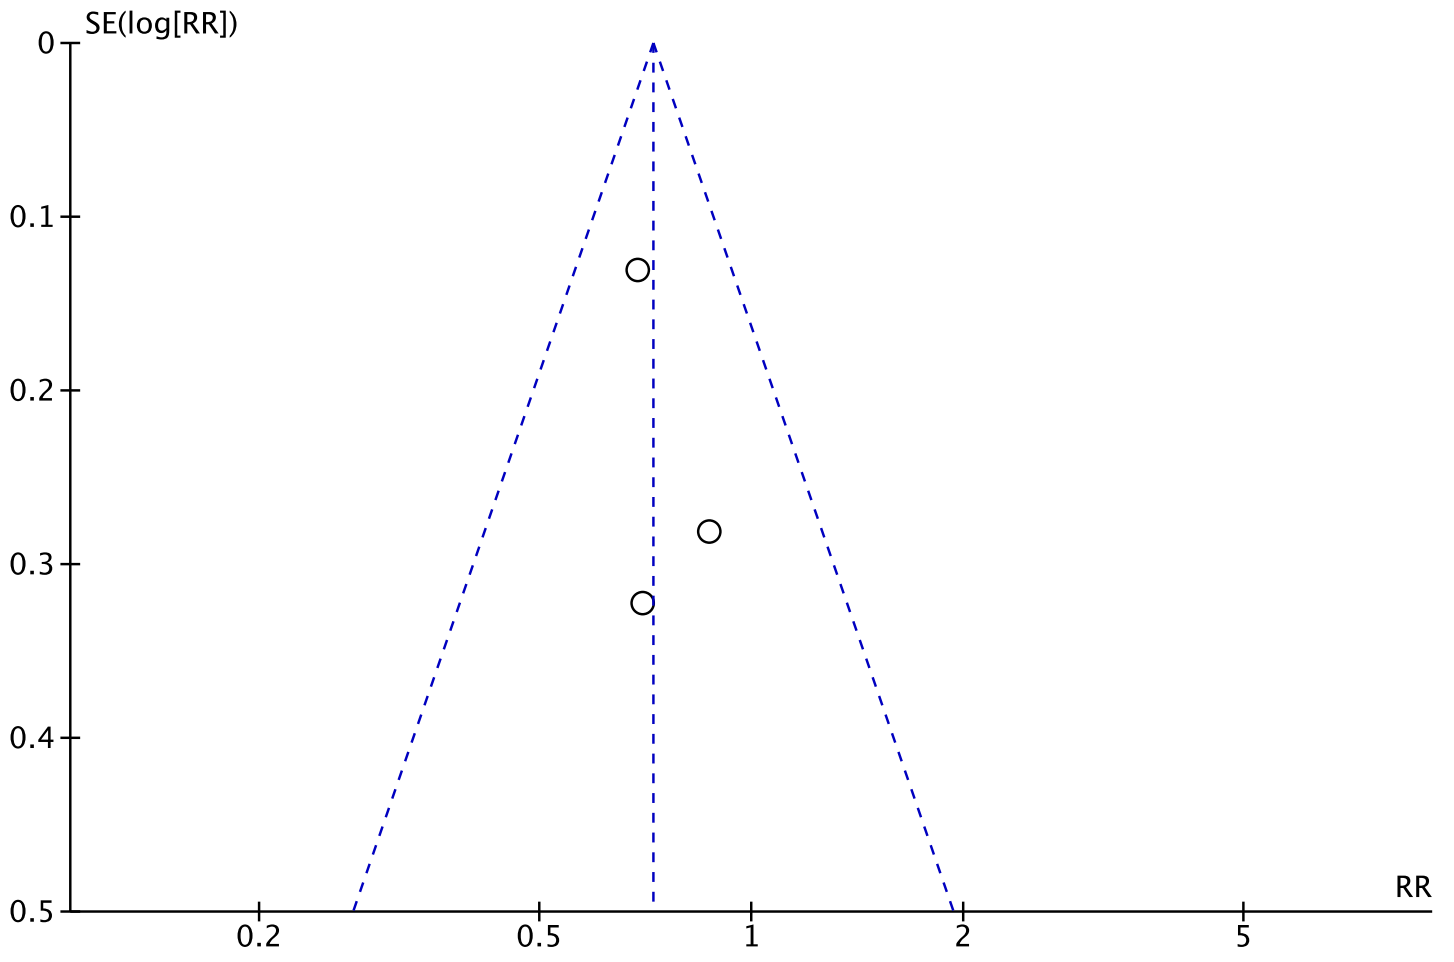

Supplement: MOESM3 [file 15455202]
